# Supplementary material for: Analysis of Psychosomatic Disorders According to Age and Sex in a Rural Area: A Population-Based Study
Source: MDPI journal article supplement (doi:10.3390/jpm12101730), 2022-10-18
Supplement: s1 [file s1]

**Table S1. Diagnostic grouped categories according to ICD-10-ES.**

| <b>Grouped category</b>              | <b>ICD/CIE-10-ES</b> | <b>Diagnostic description</b>                                                                             |
|--------------------------------------|----------------------|-----------------------------------------------------------------------------------------------------------|
| <b>Depression</b>                    | C01F32.0             | Major depressive disorder, single episode, mild                                                           |
|                                      | C01F32.1             | Major depressive disorder, single episode, moderate                                                       |
|                                      | C01F32.2             | Major depressive disorder, single episode, severe without psychotic symptoms                              |
|                                      | C01F32.3             | Major depressive disorder, single episode, severe with psychotic symptoms                                 |
|                                      | C01F32.9             | Major depressive disorder, single episode, unspecified                                                    |
|                                      | C01F32.89            | Other episodes: atypical depression, post schizophrenic depression, single episode of “masked depression” |
|                                      | C01F33.0             | Major depressive disorder, recurrent, mild                                                                |
|                                      | C01F33.1             | Major depressive disorder, recurrent, moderate                                                            |
|                                      | C01F33.2             | Major depressive disorder, recurrent, severe without psychotic symptoms                                   |
|                                      | C01F33.3             | Major depressive disorder, recurrent, severe with psychotic symptoms                                      |
|                                      | C01F33.9             | Major depressive disorder, recurrent, unspecified                                                         |
|                                      | C01F33.4             | Major depressive disorder, recurrent, in remission, no specified                                          |
| <b>Persistent mood disorder</b>      | C01F34.0             | Cyclothymic disorder                                                                                      |
|                                      | C01F34.1             | Dysthymic disorder                                                                                        |
|                                      | C01F34.9             | Persistent mood disorder [affective], unspecified                                                         |
|                                      | C01F34.89            | Other persistent mood disorder [affective]                                                                |
| <b>Anxiety</b>                       | C01F41.0             | Panic disorder [episodic paroxysmal anxiety]                                                              |
|                                      | C01F41.1             | Generalized anxiety disorder                                                                              |
|                                      | C01F41.3             | Other mixed anxiety disorders                                                                             |
|                                      | C01F41.8             | Other anxiety disorders: anxiety-hysteria, mixed anxiety-depressive disorder                              |
|                                      | C01F41.9             | Anxiety disorder, unspecified                                                                             |
| <b>Stress</b>                        | C01F43.0             | Acute stress reaction                                                                                     |
|                                      | C01F43.9             | Reaction to stress, severe, unspecified                                                                   |
|                                      | C01F43.10            | Posttraumatic stress disorder, unspecified                                                                |
|                                      | C01F43.11            | Post-traumatic stress disorder, acute                                                                     |
|                                      | C01F43.20            | Adjustment disorder, unspecified                                                                          |
|                                      | C01F43.21            | Adjustment disorder with depressed mood                                                                   |
|                                      | C01F43.22            | Adjustment disorder with anxiety                                                                          |
|                                      | C01F43.23            | Mixed adjustment disorder, with anxiety and depression                                                    |
|                                      | C01F43.25            | Adjustment disorder with mixed disturbance of emotions and conduct                                        |
|                                      | C01F43.29            | Adjustment disorder with other symptoms                                                                   |
| <b>Conversion disorder</b>           | C01F44.4             | Conversion disorder with motor symptom or deficit                                                         |
|                                      | C01F44.5             | Conversion disorder with seizures or convulsions                                                          |
|                                      | C01F44.9             | Dissociative and conversion disorder, unspecified                                                         |
| <b>Somatoform disorder</b>           | C01F45.0             | Somatization disorder                                                                                     |
|                                      | C01F45.1             | Undifferentiated somatoform disorder                                                                      |
|                                      | C01F45.8             | Other somatoform disorders                                                                                |
|                                      | C01F45.9             | Somatoform disorder, unspecified                                                                          |
|                                      | C01F45.20            | Hypochondriacal disorder, unspecified                                                                     |
|                                      | C01F45.22            | Body dysmorphic disorder                                                                                  |
|                                      | C01F45.41            | Pain disorder exclusively related to psychological factors                                                |
|                                      | C01F45.42            | Pain disorder related to psychological factors                                                            |
|                                      | C01F54               | Psychological and behavioural factors associated with somatic functions                                   |
| <b>Non-psychotic mental disorder</b> | C01F48.1             | Depersonalization-derealization syndrome                                                                  |
|                                      | C01F48.8             | Other nonpsychotic mental disorders: neurosis, psychogenic syncope, neurasthenia                          |
|                                      | C01F48.9             | Nonpsychotic mental disorder, unspecified                                                                 |

|                                                        |             |                                                                                     |
|--------------------------------------------------------|-------------|-------------------------------------------------------------------------------------|
| <b>Eating disorder</b>                                 | C01F50.00   | Anorexia nervosa, unspecified                                                       |
|                                                        | C01F50.2    | Bulimia nervosa                                                                     |
|                                                        | C01F50.9    | Eating disorder, unspecified: atypical anorexia/bulimia, other eating disorder      |
|                                                        | C01F50.81   | Binge eating disorder                                                               |
|                                                        | C01F50.89   | Other specified eating disorders: psychogenic loss of appetite, pica in adults      |
| <b>Sleep disorder</b>                                  | C01F51.01   | Primary insomnia                                                                    |
|                                                        | C01F51.02   | Adjustment insomnia                                                                 |
|                                                        | C01F51.04   | Psychophysiologic insomnia                                                          |
|                                                        | C01F51.05   | Insomnia due to another mental disorder                                             |
|                                                        | C01F51.09   | Other types of insomnia not due to substance or known physiological condition       |
|                                                        | C01F51.11   | Primary hypersomnia                                                                 |
|                                                        | C01F51.19   | Other types of hypersomnia not due to substance or known physiological condition    |
|                                                        | C01F51.3    | Sleepwalking [somnambulism]                                                         |
|                                                        | C01F51.4    | Sleep terrors [night terrors]                                                       |
|                                                        | C01F51.5    | Nightmare disorder                                                                  |
|                                                        | C01F51.8    | Other sleep disorders not due to a substance or known physiological condition       |
|                                                        | C01F51.9    | Sleep disorder not due to a substance or known physiological condition, unspecified |
| Signs and symptoms involving emotional state           | C01R45.0    | Nervousness: nervous tension                                                        |
|                                                        | C01R45.1    | Restlessness and agitation                                                          |
|                                                        | C01R45.2    | Unhappiness                                                                         |
|                                                        | C01R45.3    | Demoralization and apathy                                                           |
|                                                        | C01R45.4    | Irritability and anger                                                              |
|                                                        | C01R45.851  | Suicidal ideations                                                                  |
|                                                        | C01R45.6    | Violent behaviour                                                                   |
|                                                        | C01R45.7    | State of emotional shock and stress, unspecified                                    |
|                                                        | C01R45.81   | Low self-esteem                                                                     |
|                                                        | C01R45.82   | Worries                                                                             |
|                                                        | C01R45.83   | Excessive crying                                                                    |
|                                                        | C01R45.84   | Anhedonia                                                                           |
|                                                        | C01R45.86   | Emotional lability                                                                  |
|                                                        | C01R45.87   | Impulsiveness                                                                       |
|                                                        | C01R45.89   | Other signs and symptoms involving emotional state                                  |
| Signs and symptoms relating to appearance and behavior | C01R46.0    | Very low level of personal hygiene                                                  |
|                                                        | C01R46.2    | Strange and inexplicable behaviour                                                  |
|                                                        | C01R46.3    | Overactivity                                                                        |
|                                                        | C01R46.7    | Verbosity and circumstantial detail obscuring reason for contact                    |
|                                                        | C01R46.89   | Other symptoms and signs involving appearance and behaviour                         |
| <b>Malaise and fatigue</b>                             | C01R53.1    | Asthenia, weakness                                                                  |
|                                                        | C01R53.81   | Other types of malaise: debility, general physical deterioration, malaise           |
|                                                        | C01R53.82   | Chronic fatigue, unspecified [chronic fatigue syndrome]                             |
|                                                        | C01R53.83   | Other types of fatigue: tiredness, lack of energy, lethargy                         |
| Abuse, neglect and other mistreatment, confirmed       | C01T74.11   | Adult physical abuse, confirmed                                                     |
|                                                        | C01T74.11XA | Adult physical abuse, confirmed, initial encounter                                  |
|                                                        | C01T74.12XA | Child physical abuse, confirmed, initial encounter                                  |
|                                                        | C01T74.21XA | Adult sexual abuse, confirmed, initial encounter                                    |
|                                                        | C01T74.21XD | Adult sexual abuse, confirmed, subsequent encounter                                 |
|                                                        | C01T74.22XA | Child sexual abuse, confirmed, initial encounter                                    |
|                                                        | C01T74.22XS | Child sexual abuse, confirmed, sequela                                              |
|                                                        | C01T74.31   | Adult psychological abuse, confirmed                                                |
|                                                        | C01T74.31XA | Adult psychological abuse, confirmed, initial encounter                             |
|                                                        | C01T74.32XA | Child psychological abuse, confirmed, initial encounter                             |
|                                                        | C01T74.91XA | Unspecified adult maltreatment, confirmed, initial encounter                        |
|                                                        | C01T74.92XA | Unspecified child maltreatment, confirmed, initial encounter                        |

|                                                             |             |                                                                                                                                                    |
|-------------------------------------------------------------|-------------|----------------------------------------------------------------------------------------------------------------------------------------------------|
| Abuse, neglect and other mistreatment, suspected            | C01T76.11XA | Adult physical abuse, suspected, initial encounter                                                                                                 |
|                                                             | C01T76.21XA | Adult sexual abuse, suspected, initial encounter                                                                                                   |
|                                                             | C01T76.22   | Child sexual abuse, suspected                                                                                                                      |
|                                                             | C01T76.22XA | Child sexual abuse, suspected, initial encounter                                                                                                   |
|                                                             | C01T76.31   | Adult psychological abuse, suspected                                                                                                               |
|                                                             | C01T76.31XA | Adult psychological abuse, suspected, initial encounter                                                                                            |
|                                                             | C01T76.91XA | Unspecified adult maltreatment, suspected, initial encounter                                                                                       |
| PR to occupation and unemployment                           | C01Z56.0    | Unemployment, unspecified                                                                                                                          |
|                                                             | C01Z56.4    | Discord with boss and workmates                                                                                                                    |
|                                                             | C01Z56.5    | Uncongenial work environment                                                                                                                       |
|                                                             | C01Z56.6    | Other physical and mental strain related to work                                                                                                   |
|                                                             | C01Z56.89   | Other problems related to employment                                                                                                               |
|                                                             | C01Z56.9    | Unspecified problems related to employment                                                                                                         |
| PR to housing and financial circumstances                   | C01Z59.0    | Homelessness                                                                                                                                       |
|                                                             | C01Z59.1    | Inadequate housing: unsatisfactory environment, faults and spatial restrictions                                                                    |
|                                                             | C01Z59.2    | Discord with neighbors, lodgers and landlord                                                                                                       |
|                                                             | C01Z59.3    | Problems related to living in residential institution                                                                                              |
|                                                             | C01Z59.4    | Lack of adequate food                                                                                                                              |
|                                                             | C01Z59.5    | Extreme poverty                                                                                                                                    |
|                                                             | C01Z59.6    | Low economic income                                                                                                                                |
|                                                             | C01Z59.7    | Insufficient social insurance and welfare support                                                                                                  |
|                                                             | C01Z59.8    | Other problems related to housing and economic circumstances                                                                                       |
|                                                             | C01Z59.9    | Problem related to housing and economic circumstances, unspecified                                                                                 |
| PR to social environment                                    | C01Z60.0    | Problems of adjustment to life-cycle transitions                                                                                                   |
|                                                             | C01Z60.2    | Problems related to living alone                                                                                                                   |
|                                                             | C01Z60.3    | Acculturation difficulty                                                                                                                           |
|                                                             | C01Z60.4    | Social exclusion and rejection                                                                                                                     |
|                                                             | C01Z60.8    | Other problems related to the social environment                                                                                                   |
|                                                             | C01Z60.9    | Problem related to social environment, unspecified                                                                                                 |
| PR to parenting                                             | C01Z62.0    | Inadequate parental control and supervision                                                                                                        |
|                                                             | C01Z62.21   | Child custody for economic reasons                                                                                                                 |
|                                                             | C01Z62.22   | Institutional upbringing                                                                                                                           |
|                                                             | C01Z62.6    | Inappropriate (excessive) parental pressure                                                                                                        |
|                                                             | C01Z62.810  | Personal history of physical and sexual abuse in childhood                                                                                         |
|                                                             | C01Z62.811  | Personal history of psychological abuse in childhood                                                                                               |
|                                                             | C01Z62.812  | Personal history of neglect in childhood                                                                                                           |
|                                                             | C01Z62.890  | Parent-child estrangement NEC                                                                                                                      |
|                                                             | C01Z62.891  | Sibling rivalry                                                                                                                                    |
|                                                             | C01Z62.898  | Other specified problems related to parenting                                                                                                      |
|                                                             | C01Z62.9    | Problem related to upbringing, unspecified                                                                                                         |
| PR to primary support group, including family circumstances | C01Z63.0    | Problems in the relationship with spouse or partner                                                                                                |
|                                                             | C01Z63.1    | Problems in the relationship with in-laws                                                                                                          |
|                                                             | C01Z63.3    | Absence of a family member                                                                                                                         |
|                                                             | C01Z63.32   | Other type of family member absence                                                                                                                |
|                                                             | C01Z63.4    | Disappearance and death of a family member                                                                                                         |
|                                                             | C01Z63.5    | Disruption of family by separation and divorce                                                                                                     |
|                                                             | C01Z63.6    | Dependent relative needing care at home                                                                                                            |
|                                                             | C01Z63.72   | Alcoholism and drug addiction in the family                                                                                                        |
|                                                             | C01Z63.79   | Other stressful life events affecting the family and household [health problems within family, ill or disturbed family member, isolated family...] |
|                                                             | C01Z63.8    | Other problems related to the primary support group [High expressed emotional level within family, inadequate or distorted communication...]       |
|                                                             | C01Z63.9    | Problem related to the primary support group [relationship disorder]                                                                               |

|                                                                     |            |                                                                                                  |
|---------------------------------------------------------------------|------------|--------------------------------------------------------------------------------------------------|
| Other psychosocial circumstances                                    | C01Z64.0   | Problems related to unwanted pregnancy                                                           |
|                                                                     | C01Z65.0   | Conviction in civil and criminal proceedings, without imprisonment                               |
|                                                                     | C01Z65.3   | Problems related to other legal circumstances                                                    |
|                                                                     | C01Z65.8   | Other specific problems related to psychosocial circumstances [religious or spiritual problem]   |
|                                                                     | C01Z65.9   | Problem related to unspecified psychosocial circumstances                                        |
|                                                                     | C01Z69.81  | Encounter for mental health services for victim of other abuse                                   |
| Counseling related to attitude, behavior and sexual orientation     | C01Z70.0   | Counseling regarding to sexual attitude                                                          |
|                                                                     | C01Z70.1   | Counseling related to patient's sexual behaviour and orientation [promiscuity, impotence...]     |
|                                                                     | C01Z70.2   | Counseling related to sexual behavior and orientation of third party [partner, child, spouse...] |
|                                                                     | C01Z70.3   | Counseling related to combined concerns regarding sexual attitude, behaviour and orientation     |
|                                                                     | C01Z70.8   | Other sex counseling [contact for sexual education]                                              |
|                                                                     | C01Z70.9   | Sex counseling, unspecified                                                                      |
| Contact with healthcare services for other types of medical concern | C01Z71.3   | Dietary advice and surveillance                                                                  |
|                                                                     | C01Z71.4   | Alcohol abuse counseling and surveillance                                                        |
|                                                                     | C01Z71.41  | Alcohol abuse counseling and surveillance of alcoholic                                           |
|                                                                     | C01Z71.42  | Counseling for family member of alcoholic                                                        |
|                                                                     | C01Z71.5   | Drug abuse counseling and surveillance                                                           |
|                                                                     | C01Z71.51  | Drug abuse counseling and surveillance of drug abuser                                            |
|                                                                     | C01Z71.6   | Tobacco dependence counseling                                                                    |
|                                                                     | C01Z71.89  | Other specific advice                                                                            |
|                                                                     | C01Z71.9   | Counseling, unspecified                                                                          |
| PR to lifestyle                                                     | C01Z72.0   | Tobacco use                                                                                      |
|                                                                     | C01Z72.3   | Lack of physical exercise                                                                        |
|                                                                     | C01Z72.4   | Inappropriate diet and eating habits                                                             |
|                                                                     | C01Z72.51  | High risk heterosexual behaviour                                                                 |
|                                                                     | C01Z72.53  | High risk bisexual behaviour                                                                     |
|                                                                     | C01Z72.810 | Child and adolescent antisocial behaviour                                                        |
|                                                                     | C01Z72.811 | Adult antisocial behaviour                                                                       |
|                                                                     | C01Z72.821 | Inadequate sleep hygiene                                                                         |
|                                                                     | C01Z72.89  | Other problems related to lifestyle [self-damaging behaviour]                                    |
|                                                                     | C01Z72.9   | Problem related to lifestyle, unspecified                                                        |
| PR to difficulty in controlling their life                          | C01Z73.1   | Type A behaviour pattern                                                                         |
|                                                                     | C01Z73.2   | Lack of relaxation and leisure                                                                   |
|                                                                     | C01Z73.3   | Stress, not elsewhere classified [physical and mental tension]                                   |
|                                                                     | C01Z73.4   | Inadequate social skills, not elsewhere classified                                               |
|                                                                     | C01Z73.5   | Social role conflict, not elsewhere classified                                                   |
|                                                                     | C01Z73.6   | Limitation of activities due to disability                                                       |
|                                                                     | C01Z73.9   | Problem related to life management difficulty, unspecified                                       |
| PR to caring for a dependent person                                 | C01Z74     | Problems related to the provider of care to the dependent person                                 |
|                                                                     | C01Z74.01  | Bed confinement status                                                                           |
|                                                                     | C01Z74.09  | Other reduced mobility [chair-ridden]                                                            |
|                                                                     | C01Z74.1   | Need for assistance with personal care                                                           |
|                                                                     | C01Z74.2   | Need for assistance at home and no other household member able to render care                    |
|                                                                     | C01Z74.3   | Need for ongoing supervision                                                                     |
|                                                                     | C01Z74.8   | Other Dependent Care Provider Related Issues                                                     |
|                                                                     | C01Z74.9   | Problem related to care provider dependency, unspecified                                         |
